# Supplementary material
Source: publisher figshare collection journal article supplement (https://gsajournals.figshare.com/ndownloader/files/14657198)
Supplement: Supplementary file 1 [file 14657198]

## Sheet: Sheet1
Table S1: Alignment summary statistics for the various samples included in this study. Each row corresponds to a sample. The column ‘Generated Reads’ refers to the number of sequences generated for the sample. ‘Mapped Reads’ refers to the sequences that aligned with a mapping quality > 0, and ‘Properly Paired’ refers to the number of reads that align within the expected distance from their mate. …
Sample	Generated Reads	Duplicate Reads(%)	Aligned Reads(%)	Mapped Reads(%)	Properly Paired(%)	Generated Bases	Duplicate Bases(%)	Aligned Bases(%)	Mapped Bases(%)
1012	248125464	6.63	87.34	71.68	60.84	62031366000	5.58	75.31	63.34
1037	21402346	4.67	87.71	73.37	68.64	3210351900	4.39	80.34	68.02
13696	23477242	15.85	90.43	68.42	60.01	3521586300	7.56	75.34	61.41
13702	28200272	8.98	91.15	72.76	70.97	4230040800	8.54	83.63	67.41
13712	35661984	4.36	92.15	77.9	72.41	5349297600	4.02	84.17	72.07
13714	32020568	5.63	89.68	75.01	70.95	4803085200	5.24	81.64	69.17
13738	29692520	9.71	87.87	69.48	70.12	4453878000	9.18	80.7	64.38
13740	28226938	3.68	92.13	78.09	71.99	4234040700	3.45	84.45	72.45
13744	31097764	6.71	91.57	76.19	71.29	4664664600	6.11	83.78	70.59
13750	23075516	4.63	90.09	74.98	70.39	3461327400	4.39	82.79	69.66
13752	22102324	3.18	89.45	75.63	69.26	3315348600	2.95	81.65	69.95
13758	29589106	4.48	92.02	77.24	72.92	4438365900	4.03	83.48	71.09
13784	23815934	11.49	92.65	71.86	73.18	3572390100	10.51	84.29	66.1
13786	25319024	6.58	87.86	71.91	70.09	3797853600	6.14	80.43	66.58
13792	23083652	3.66	88.98	74.84	69.54	3462547800	3.43	81.43	69.35
13797	22109796	3.63	78.78	65.36	61.65	3316469400	3.37	71.92	60.45
13801	38444126	5.71	91.53	76.57	71.71	5766618900	5.4	84.01	71.08
13813	31861518	5.37	91.55	76.28	71.67	4779227700	5.07	84.09	70.85
13815	26555588	3.59	92.65	78.99	72.39	3983338200	3.33	84.81	73.23
13819	26601006	3.43	91.09	77.41	70.58	3990150900	3.23	83.53	71.86
13827	33640878	6.57	85.95	71.31	68.02	5046131700	6.16	78.74	66.1
13837	34678088	3.62	91.43	77.56	70.74	5201713200	3.4	83.96	72.08
13901	27478230	5.24	87.4	72.2	66.98	4121734500	4.84	79.86	66.83
13903	35754706	5.68	92.2	77.09	73.94	5363205900	5.18	83.41	70.73
13905	29850308	5.23	87.94	73.51	69.61	4477546200	4.63	79.34	67.41
13907	25335712	4.64	91.42	77.17	72.85	3800356800	4.32	83.37	71.29
13911	23423254	11.37	92.57	71.34	72.22	3513488100	10.6	84.59	65.85
13917	33179724	7.23	91.86	75.58	74.86	4976958600	6.49	82.61	68.99
13919	26744136	6.47	89.45	73.15	69.92	4011620400	6.07	82.01	67.81
13925	26857412	5.15	90.27	75.32	72.26	4028611800	4.72	81.8	69.2
13933	21641700	3.48	90.86	76.63	71.56	3246255000	3.22	83.06	70.93
13939	32278460	11.11	85.85	66.48	67.22	4841769000	10.32	78.12	61.16
14120	313430376	6.38	88.09	72.31	60.21	78357594000	4.73	74	62.8
2655	24381830	5.02	91.98	77.02	72.43	3657274500	4.74	84.3	71.41
2699	26490666	5.96	88.26	73.27	71.44	3973599900	5.52	80.05	67.34
4923	27322326	6.74	88.47	72.58	70.78	4098348900	6.32	80.72	67
4927	31420844	4.62	89.72	75.49	70.46	4713126600	4.32	81.95	69.82
4928	23058326	4.79	84.21	69.8	66.97	3458748900	4.44	76.5	64.25
4959	29246892	4.12	89.94	75.8	70.74	4387033800	3.83	82.16	70.13
4960	20437688	3.68	88.83	74.46	70.11	3065653200	3.4	81.02	68.8
5524	29159146	6.72	82.82	67.97	66.05	4373871900	6.35	75.88	62.95
6895	30074552	5.06	89.86	75.33	70.17	4511182800	4.79	82.53	69.98
